# Supplementary material for: Ultrasonic-induced nanocomposites with anatase@amorphous TiO2 core–shell structure and their photocatalytic activity
Source: Royal Society of Chemistry journal article supplement (doi:10.1039/c6ra14007f), 2016-01-01
Supplement: c6ra14007f1.pdf [file c6ra14007f1.pdf]

## **Supplementary Information**

### **Ultrasonic-Induced Nanocomposites with anatase@amorphous TiO<sub>2</sub> Core-Shell Structure and their Photocatalytic Activity**

Chenyao Fan, Xinxin Fu, Lin Shi, Siqi Yu, Guodong Qian, Zhiyu Wang\*

State Key Laboratory of Silicon Materials, Department of Materials Science and  
engineering, Zhejiang University, Zheda Road 38, 310027, Hangzhou, China

## Figures

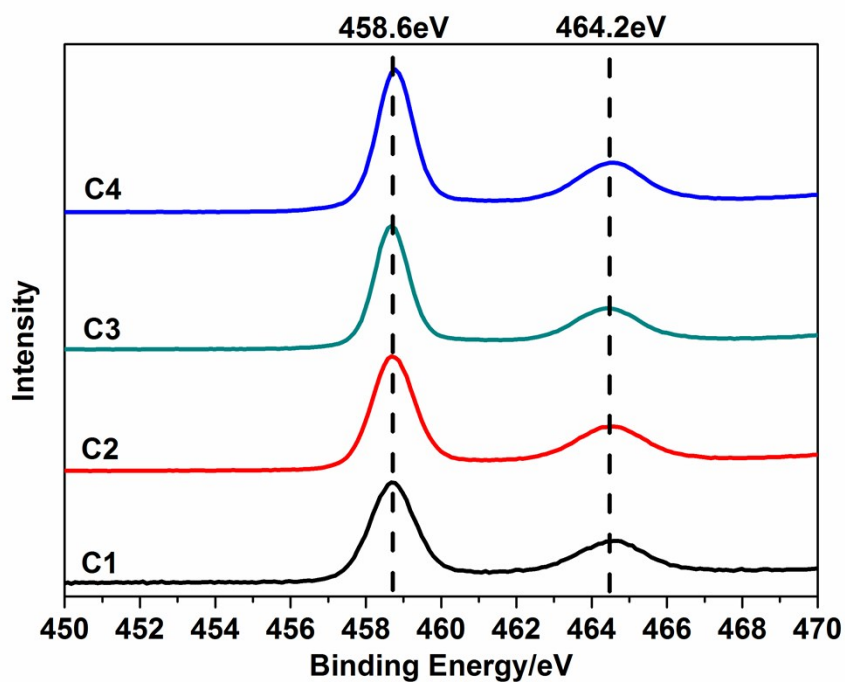

**Figure S1.** Ti 2p XPS spectra of anatase@amorphous TiO<sub>2</sub> core-shell structure composites with various phase proportions.

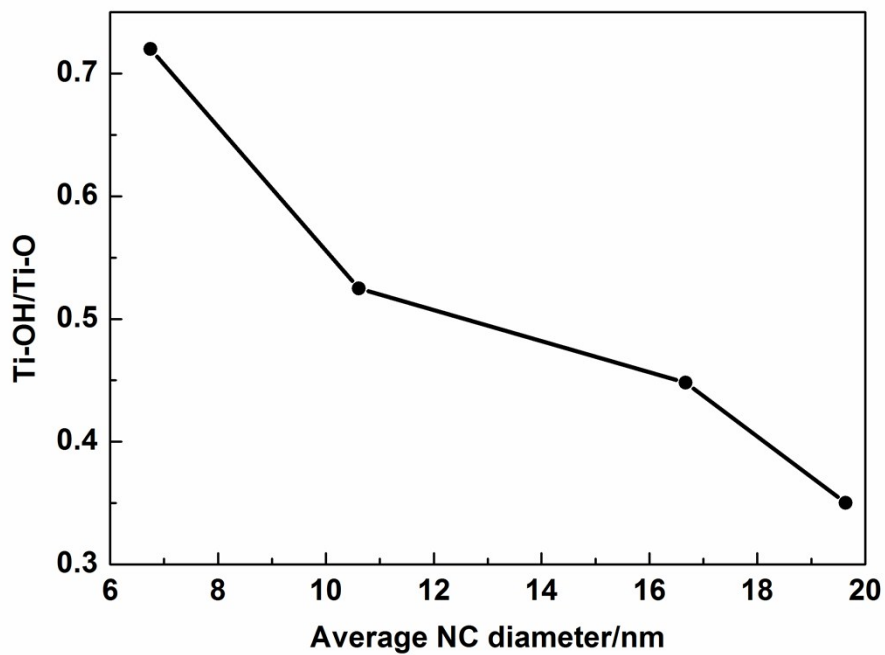

**Figure S2.** Changes of Ti-OH/Ti-O ratio in anatase@amorphous TiO<sub>2</sub> core-shell structure composites with various phase proportions.

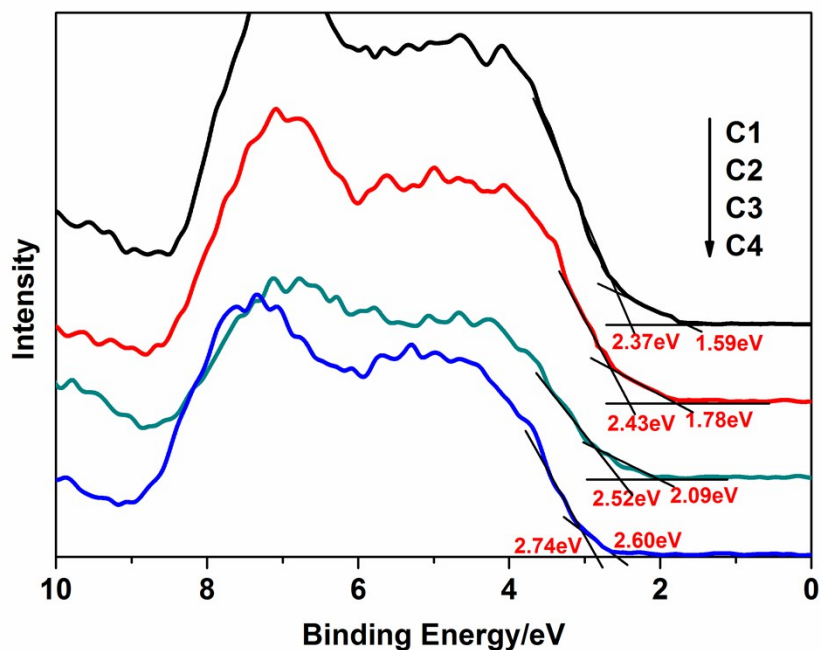

**Figure S3.** VB XPS spectra of anatase@amorphous  $\text{TiO}_2$  core-shell structure composites with various phase proportions.

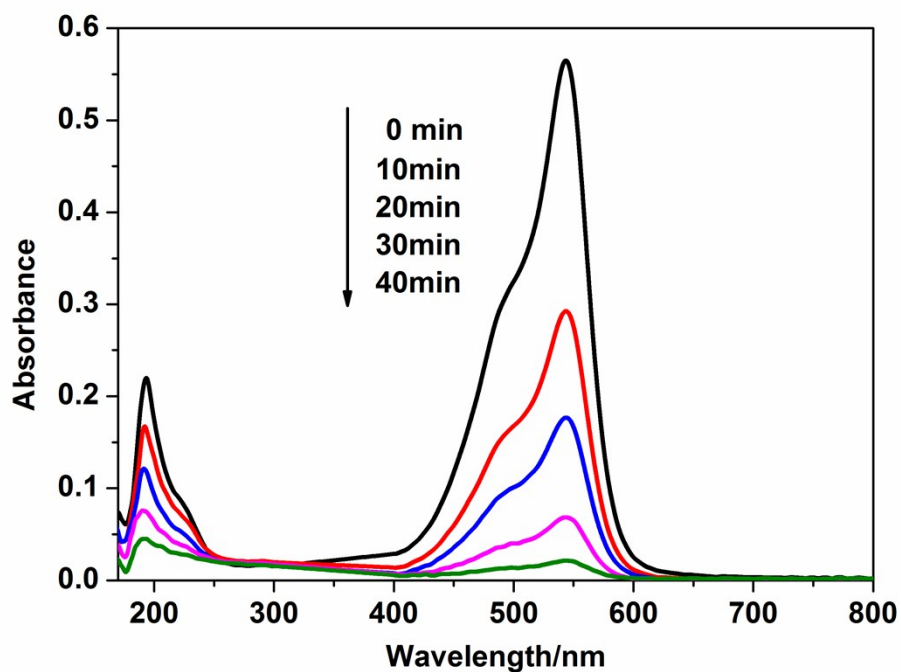

**Figure S4.** Absorption spectra of AF solution at different time after irradiating with simulated solar light and using C2 as the photocatalyst.

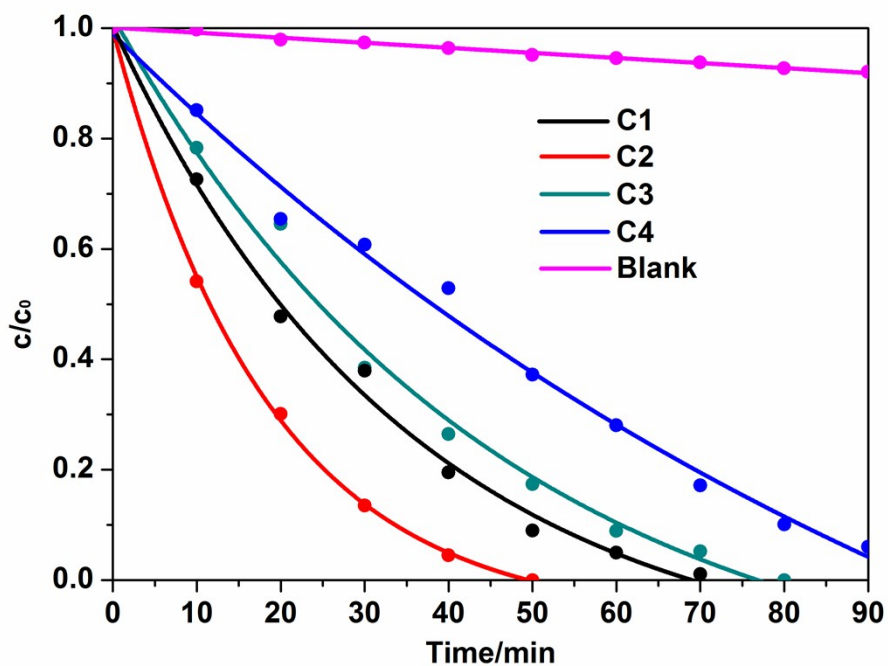

**Figure S5.** Evaluations of solar-driven photocatalytic activity (AF degradation) of anatase@amorphous TiO<sub>2</sub> core-shell structure composites with various phase proportions.

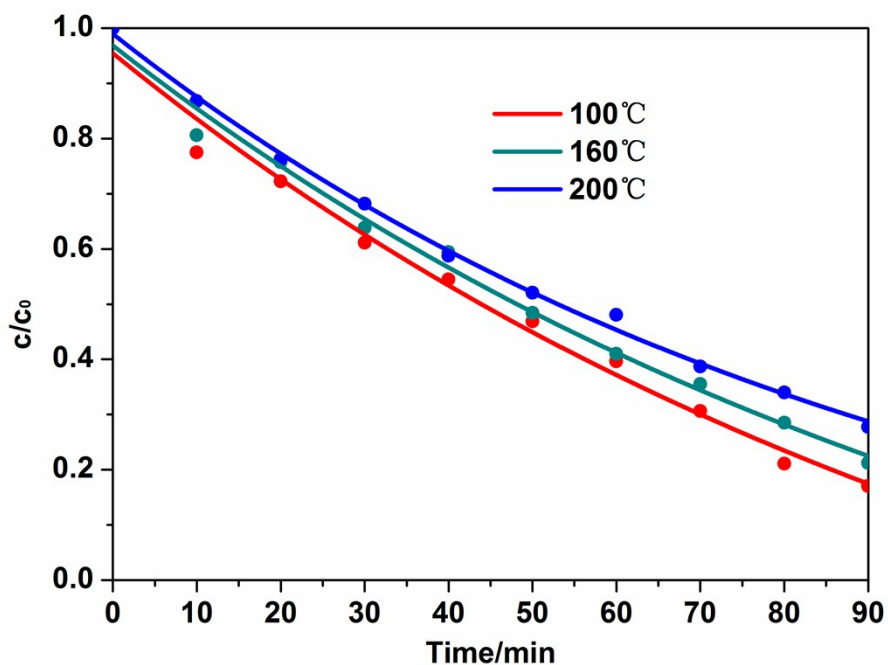

**Figure S6.** Evaluations of solar-driven photocatalytic activity (AF degradation) of hydrothermally synthesized anatase NCs at 100°C, 160°C and 200°C respectively.

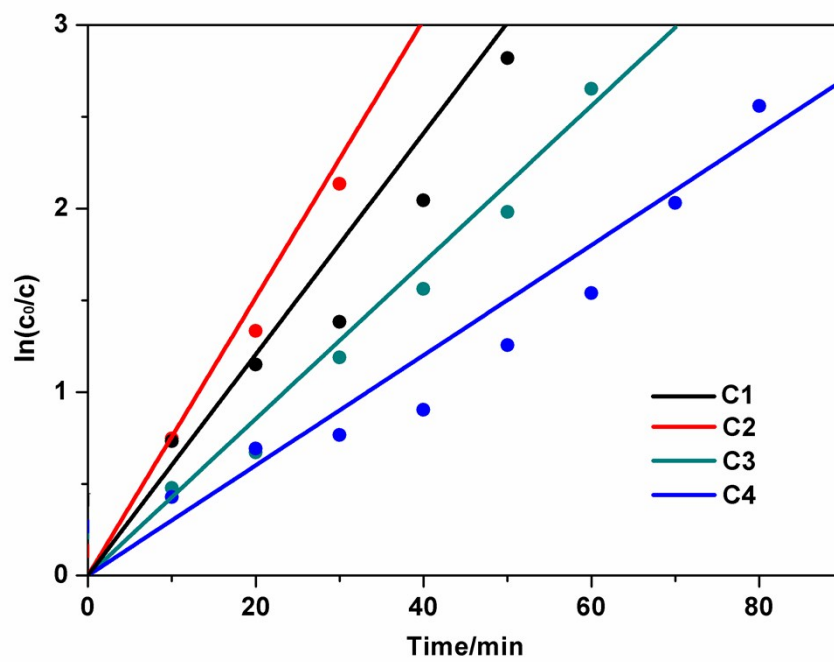

**Figure S7.** Kinetic plots of photocatalysis for anatase@amorphous  $\text{TiO}_2$  core-shell structure composites with various phase proportions
